# Supplementary material for: Extracellular matrix and α5β1 integrin signaling control the maintenance of bone formation capacity by human adipose-derived stromal cells
Source: PubMed Central journal article supplement (PMC5349595; doi:10.1038/srep44398), 2017-03-14
Supplement: srep44398-s1.pdf [file srep44398-s1.pdf]

## Supplementary Information

### Title

Extracellular matrix and  $\alpha_5\beta_1$  integrin signaling control the maintenance of bone formation capacity by human adipose-derived stromal cells

### Authors

Nunzia Di Maggio, Elisa Martella, Agne Frismantiene, Therese J Resink, Simone Schreiner, Enrico Lucarelli, Claude Jaquiere, Dirk J Schaefer, Ivan Martin and Arnaud Scherberich

### Supplementary Figure 1

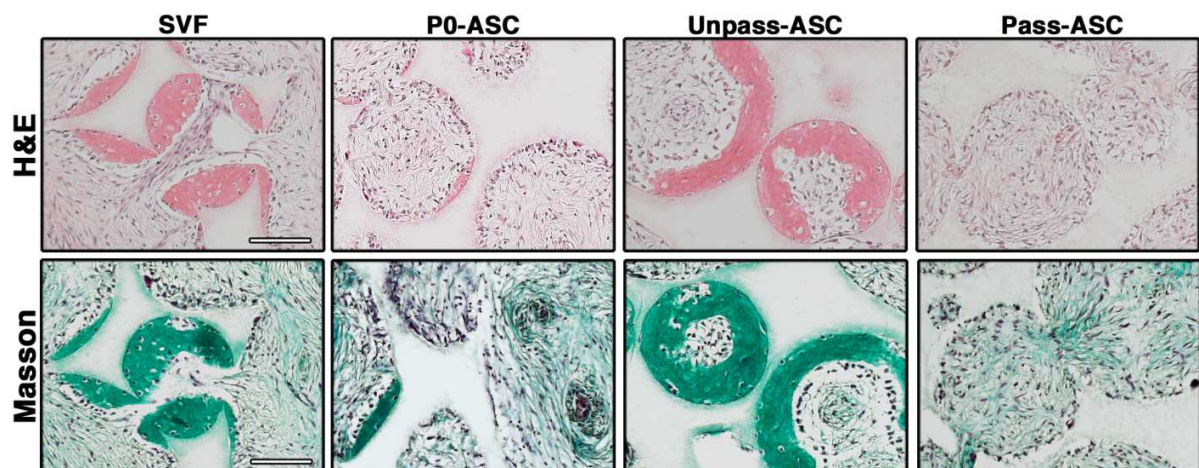

**Martin I et al. Figure S1**

Figure S1. Representative microscopy fields of histological sections of constructs loaded with SVF cells, P0, Unpass- and Pass-ASC, stained with H&E and Masson's trichrome staining. Size bar = 100  $\mu\text{m}$ .
